## CORRECTION

# Correction: Addition of Lidocaine Injection Immediately before Physiotherapy for Frozen Shoulder: A Randomized Controlled Trial

The *PLOS ONE* Staff

[Fig 1](#) and [Fig 2](#) are incorrect. Please view correct versions of the figures [here](#).

There are errors in [Table 1](#) and [Table 2](#) of the published article. Please view the correct tables [here](#).

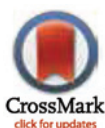

## OPEN ACCESS

**Citation:** The *PLOS ONE* Staff (2015) Correction: Addition of Lidocaine Injection Immediately before Physiotherapy for Frozen Shoulder: A Randomized Controlled Trial. *PLoS ONE* 10(4): e0125289. doi:10.1371/journal.pone.0125289

**Published:** April 15, 2015

**Copyright:** © 2015 The PLOS ONE Staff. This is an open access article distributed under the terms of the [Creative Commons Attribution License](#), which permits unrestricted use, distribution, and reproduction in any medium, provided the original author and source are credited.



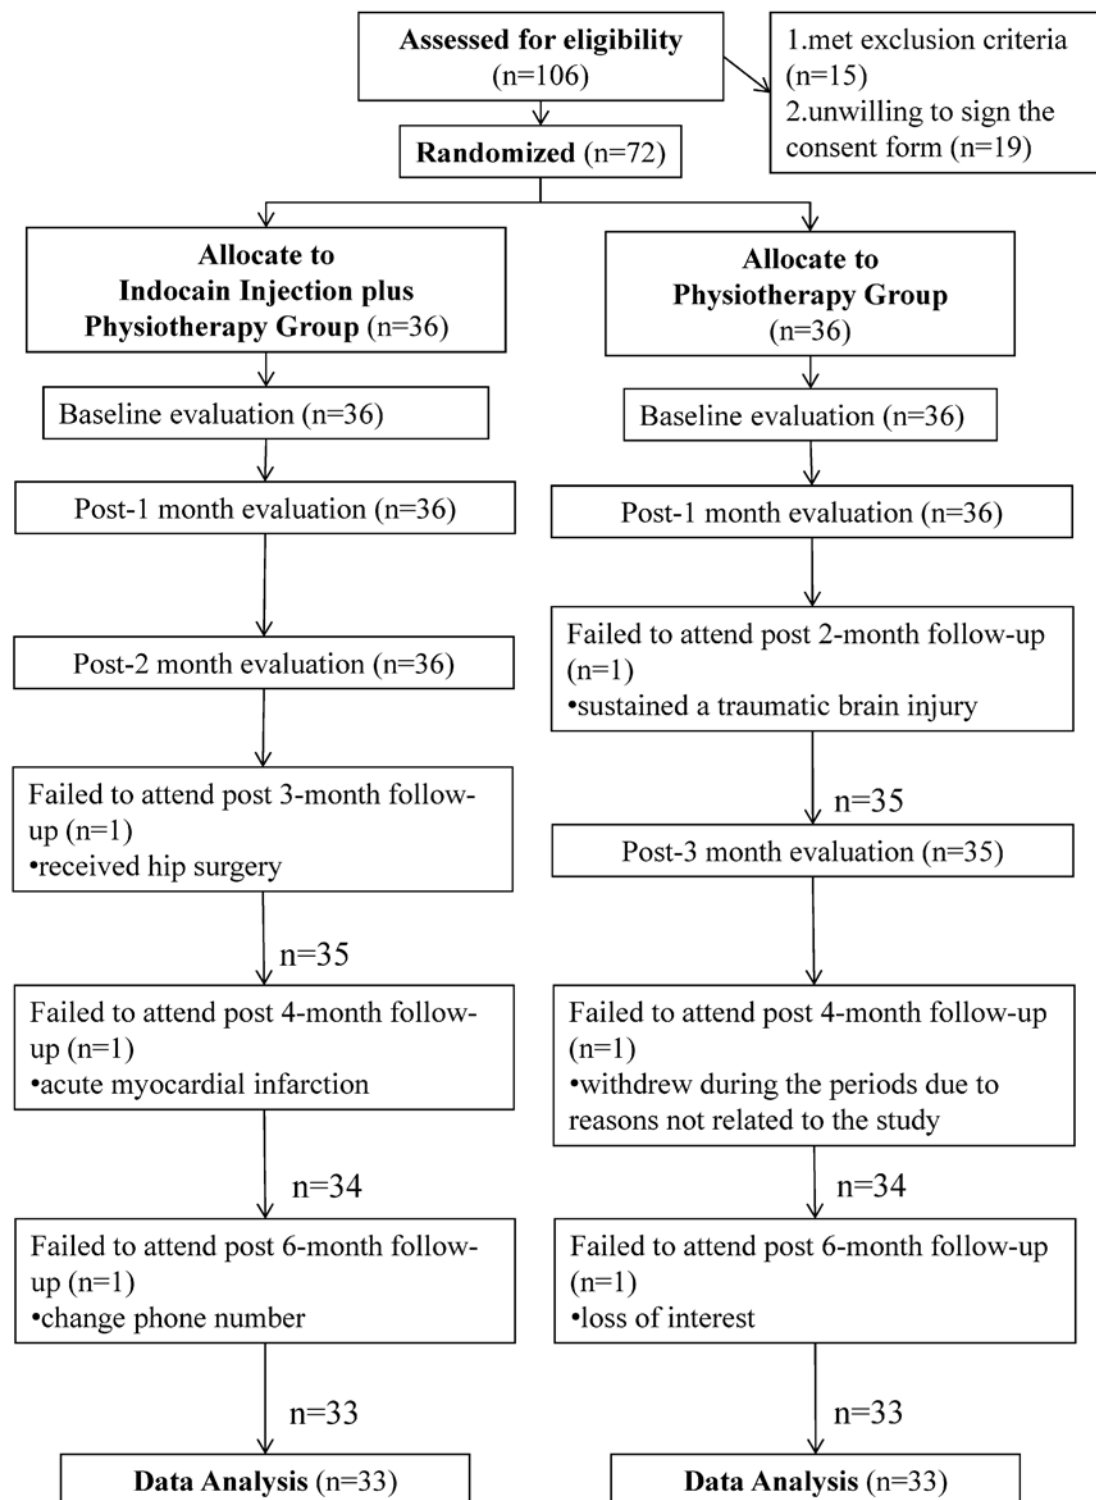

**Fig 1. The consolidated standards for reporting trials: a flow diagram of the study.** Abbreviations: PT, physiotherapy group; INJPT, lidocaine injection plus physiotherapy group.

doi:10.1371/journal.pone.0125289.g001



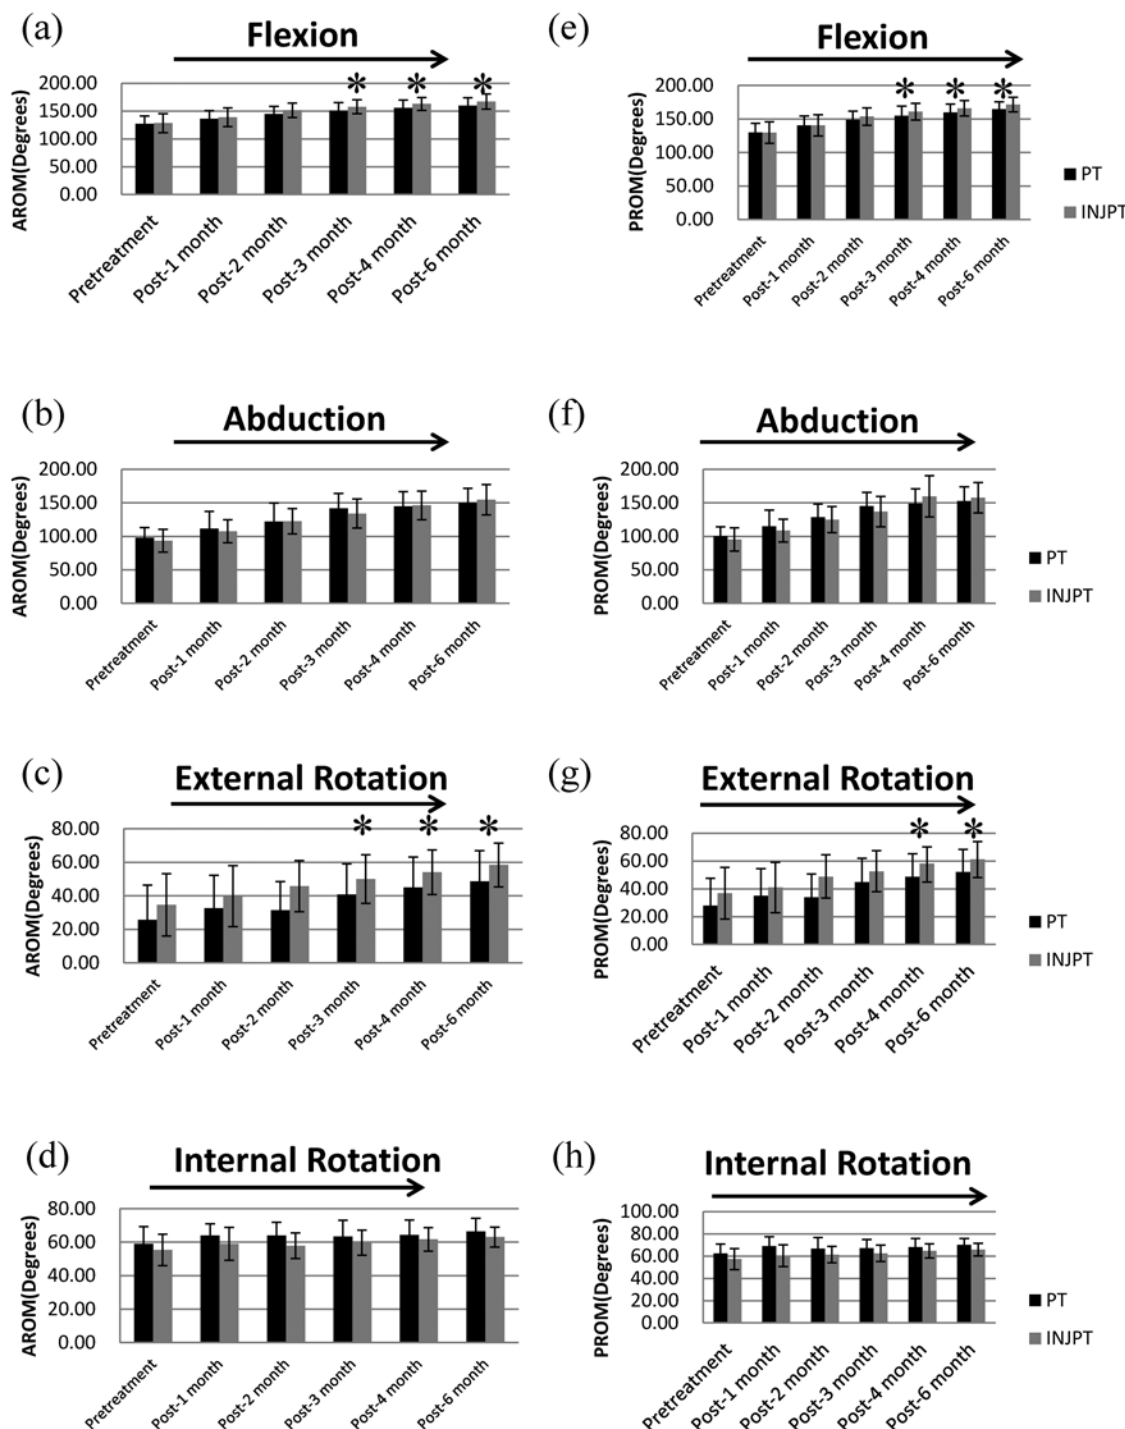

**Fig 2. Comparisons of the active and passive ROMs between the groups.** Shown as bar charts for (a) flexion, (b) abduction, (c) external rotation, and (d) internal rotation for active ROM and for (e) flexion, (f) abduction, (g) external rotation, and (h) internal rotation for passive ROM with the corresponding standard deviations represented as error bars. An asterisk indicates significant differences between groups ( $P < 0.008$ ). For the evaluation times (evaluation times: before and 1, 2, 3, 4, and 6 months after the start of treatment), a right arrow above the graph indicates a significant, linearly increasing trend, whereas a left arrow indicates a significant, linearly decreasing trend ( $P < 0.025$ ). (Black bar: the PT group; gray bar: the INJPT group). Group differences were analyzed using Mann-Whitney  $U$  test. Treatment time effects were analyzed using Friedman's test for two groups respectively. Abbreviations: PT, physical therapy; INJPT, injection plus physical therapy.

doi:10.1371/journal.pone.0125289.g002



**Table 1. Demographic and Clinical Characteristics of the Subjects**

| Characteristic            |        | PT Group (n = 33) | INJPT Group (n = 33) | <i>P</i> <sup>a</sup> |
|---------------------------|--------|-------------------|----------------------|-----------------------|
| Sex                       | male   | 8                 | 7                    | .76                   |
|                           | female | 25                | 26                   |                       |
| Exercise habits           | yes    | 11                | 13                   | .60                   |
|                           | no     | 22                | 20                   |                       |
| NSAID                     | yes    | 17                | 21                   | .31                   |
|                           | no     | 16                | 12                   |                       |
|                           |        |                   |                      | <i>P</i> <sup>b</sup> |
| Age (y)                   |        | 56.41 ± 9.44      | 54.88 ± 7.06         | .85                   |
| Weight (kg)               |        | 62.09 ± 9.69      | 59.61 ± 10.91        | .33                   |
| Height (cm)               |        | 161.09 ± 8.37     | 159.79 ± 7.87        | .51                   |
| Disease duration (months) |        | 4.54 ± 3.25       | 6.12 ± 5.05          | .14                   |

NOTE. Values are expressed as means ± SD or numbers.

Group differences were analyzed using either a chi-squared test or an independent *t* test.

<sup>a</sup>*P* < .05, significant difference from the chi-square

<sup>b</sup>*P* < .05, significant difference from the independent *t* test

Abbreviations: PT, physical therapy; INJPT, injection plus physical therapy; NSAID, non-steroidal anti-inflammatory drug.

doi:10.1371/journal.pone.0125289.t001

**Table 2. Effect of Time on the Secondary Outcome Measurements**

| Scores on Questionnaires |                      | Group | Evaluation Time |               |               |               |               |               | Time Effects |                            |
|--------------------------|----------------------|-------|-----------------|---------------|---------------|---------------|---------------|---------------|--------------|----------------------------|
|                          |                      |       | Pre-treatment   | Post-1month   | Post-2months  | Post-3 months | Post-4 months | Post-6 months |              | Mean Difference of 95% CI. |
| SDQ                      |                      | PT    | 48.20 ± 19.03   | 35.70 ± 18.81 | 29.28 ± 20.05 | 29.83 ± 18.96 | 25.33 ± 18.75 | 22.61 ± 17.94 | 0.000 ~0.146 | <.001*                     |
|                          |                      | INJPT | 39.06 ± 7.99    | 35.03 ± 8.04  | 27.02 ± 12.4  | 24.38 ± 14.33 | 19.86 ± 14.91 | 10.58 ± 15.72 | 0.000 ~0.087 | <.001*                     |
| SPADI                    | Pain                 | PT    | 46.36 ± 23.01   | 32.73 ± 18.66 | 28.30 ± 17.70 | 29.82 ± 18.72 | 24.91 ± 16.56 | 21.79 ± 16.31 | 0.000 ~0.146 | <.001*                     |
|                          |                      | INJPT | 55.27 ± 22.43   | 49.45 ± 27.92 | 31.03 ± 18.08 | 25.76 ± 16.69 | 22.91 ± 18.39 | 16.73 ± 14.27 | 0.000 ~0.087 | <.001*                     |
|                          | Disa                 | PT    | 36.25 ± 18.47   | 28.03 ± 18.50 | 23.00 ± 17.24 | 21.98 ± 19.38 | 18.77 ± 17.42 | 16.86 ± 14.48 | 0.000 ~0.146 | <.001*                     |
|                          |                      | INJPT | 54.55 ± 22.47   | 45.04 ± 22.79 | 30.34 ± 19.63 | 26.25 ± 19.78 | 21.97 ± 19.49 | 16.74 ± 16.60 | 0.000 ~0.087 | <.001*                     |
|                          | Total                | PT    | 41.31 ± 19.68   | 30.38 ± 17.85 | 25.65 ± 16.83 | 25.44 ± 18.94 | 21.31 ± 15.99 | 19.32 ± 14.75 | 0.000 ~0.146 | <.001*                     |
|                          |                      | INJPT | 54.91 ± 20.48   | 47.25 ± 22.34 | 30.69 ± 17.93 | 26.00 ± 17.65 | 22.44 ± 17.88 | 16.73 ± 14.81 | 0.000 ~0.087 | <.001*                     |
| SF-36                    | Physical functioning | PT    | 75.61 ± 15.45   | 77.88 ± 16.25 | 79.70 ± 13.93 | 79.70 ± 14.13 | 81.12 ± 15.18 | 83.30 ± 13.87 | 0.000 ~0.146 | <.001*                     |
|                          |                      | INJPT | 71.21 ± 18.79   | 73.94 ± 19.83 | 76.67 ± 17.93 | 76.97 ± 18.03 | 80.76 ± 18.33 | 81.67 ± 17.62 | 0.000 ~0.087 | <.001*                     |
|                          | Role-physical        | PT    | 44.70 ± 39.80   | 57.88 ± 40.29 | 63.67 ± 34.60 | 64.61 ± 32.10 | 65.36 ± 32.27 | 75.33 ± 35.82 | 0.000 ~0.146 | <.001*                     |

(Continued)



Table 2. (Continued)

| Scores on Questionnaires | Group | Evaluation Time |               |               |               |               |               |                            | Time Effects<br><i>P</i> * |
|--------------------------|-------|-----------------|---------------|---------------|---------------|---------------|---------------|----------------------------|----------------------------|
|                          |       | Pre-treatment   | Post-1month   | Post-2months  | Post-3 months | Post-4 months | Post-6 months | Mean Difference of 95% CI. |                            |
| Bodily pain              | INJPT | 37.88 ± 41.98   | 46.97 ± 46.25 | 65.15 ± 42.82 | 62.88 ± 41.51 | 71.97 ± 38.91 | 75.76 ± 39.27 | 0.000<br>~0.087            | <.001*                     |
|                          | PT    | 52.58 ± 13.69   | 62.27 ± 17.42 | 66.61 ± 15.97 | 62.39 ± 16.45 | 67.33 ± 14.81 | 70.73 ± 17.91 | 0.000<br>~0.146            | <.001*                     |
| General health           | INJPT | 44.55 ± 18.80   | 55.24 ± 18.46 | 61.70 ± 15.79 | 65.85 ± 15.49 | 66.39 ± 14.55 | 70.06 ± 17.87 | 0.000<br>~0.087            | <.001*                     |
|                          | PT    | 64.18 ± 19.83   | 58.52 ± 19.70 | 62.12 ± 18.57 | 59.91 ± 18.52 | 62.03 ± 80.82 | 64.76 ± 18.03 | 0.000<br>~0.146            | <.001*                     |
| Vitality                 | INJPT | 58.61 ± 19.85   | 60.42 ± 20.05 | 65.39 ± 18.98 | 64.27 ± 20.10 | 65.48 ± 19.38 | 64.76 ± 19.07 | 0.000<br>~0.142            | .006*                      |
|                          | PT    | 63.79 ± 19.29   | 62.88 ± 17.28 | 58.94 ± 14.83 | 60.88 ± 16.10 | 62.45 ± 16.66 | 65.97 ± 15.57 | 0.000<br>~0.146            | <.001*                     |
| Social functioning       | INJPT | 55.91 ± 21.45   | 58.18 ± 18.24 | 59.39 ± 19.91 | 61.06 ± 20.53 | 61.52 ± 18.81 | 61.97 ± 20.42 | 0.407<br>~0.744            | .577                       |
|                          | PT    | 79.17 ± 19.43   | 81.06 ± 22.78 | 80.95 ± 14.34 | 82.36 ± 12.72 | 84.77 ± 13.82 | 87.27 ± 13.02 | 0.000<br>~0.146            | .001*                      |
| Role-emotional           | INJPT | 79.55 ± 19.47   | 80.68 ± 15.96 | 81.06 ± 18.25 | 81.82 ± 14.01 | 85.23 ± 12.29 | 84.09 ± 12.99 | 0.050<br>~0.313            | .272                       |
|                          | PT    | 74.75 ± 37.30   | 79.80 ± 35.30 | 74.14 ± 37.74 | 77.27 ± 35.38 | 75.19 ± 35.66 | 79.75 ± 33.29 | 0.302<br>~0.751            | .474                       |
| Mental health            | INJPT | 67.68 ± 42.07   | 77.78 ± 37.88 | 76.77 ± 37.72 | 79.8 ± 38.13  | 83.84 ± 32.41 | 86.87 ± 28.79 | 0.000<br>~0.087            | .003*                      |
|                          | PT    | 68.61 ± 19.80   | 69.33 ± 18.35 | 66.48 ± 16.65 | 68.33 ± 17.45 | 69.97 ± 17.47 | 71.42 ± 17.17 | 0.000<br>~0.146            | .002*                      |
|                          | INJPT | 68.85 ± 20.90   | 69.33 ± 18.57 | 67.03 ± 19.47 | 68.73 ± 18.67 | 67.88 ± 18.53 | 64.97 ± 21.05 | 0.811<br>~1.000            | .845                       |

NOTE. Values are expressed as means ± SD or numbers.

\*Treatment time effects were analyzed using Friedman's test for two groups respectively.

\**P*<.025, significant difference

Abbreviations: CI., confidence interval; PT, physical therapy; INJPT, injection plus physical therapy; SDQ, Shoulder Disability Questionnaire; SPADI, Shoulder Pain and Disability Index; Disa, Disability; SF-36, 36-item Short-Form Health Survey

doi:10.1371/journal.pone.0125289.t002

## Reference

1. Hsu W-C, Wang T-L, Lin Y-J, Hsieh L-F, Tsai C-M, Huang K-H. (2015) Addition of Lidocaine Injection Immediately before Physiotherapy for Frozen Shoulder: A Randomized Controlled Trial. PLoS ONE 10(2): e0118217. doi: [10.1371/journal.pone.0118217](https://doi.org/10.1371/journal.pone.0118217) PMID: [25714415](https://pubmed.ncbi.nlm.nih.gov/25714415/)
